# Supplementary material for: Matrix-isolation and cryosolution-VCD spectra of α-pinene as benchmark for anharmonic vibrational spectra calculations
Source: Royal Society of Chemistry journal article supplement (doi:10.1039/d2cp04782a), 2023-01-01
Supplement: d2cp04782a1.pdf [file d2cp04782a1.pdf]

Supporting information for

# Matrix-isolation and cryosolution-VCD spectra of $\alpha$ -pinene as benchmark for anharmonic vibrational spectra calculations

Nora M. Kreienborg,<sup>a</sup> Qin Yang,<sup>b</sup> Corina H. Pollok,<sup>a</sup> Julien Bloino,<sup>\*b</sup> Christian Merten<sup>\*a</sup>

- a) Ruhr Universität Bochum  
Fakultät für Chemie und Biochemie, Organische Chemie II  
Universitätsstraße 150  
44801 Bochum, Germany  
christian.merten@ruhr-uni-bochum.de  
www.mertenlab.de
- b) Scuola Normale Superiore  
Piazza dei Cavalieri 7  
56126 Pisa, Italy  
julien.bloino@sns.it

|    |                                                                       |   |
|----|-----------------------------------------------------------------------|---|
| 1. | Additional Figures .....                                              | 2 |
| 2. | Effect of Large Amplitude Motions on Spectra of $\alpha$ -Pinene..... | 4 |
| 3. | Additional Figures for $\beta$ -Pinene .....                          | 6 |

## 1. Additional Figures

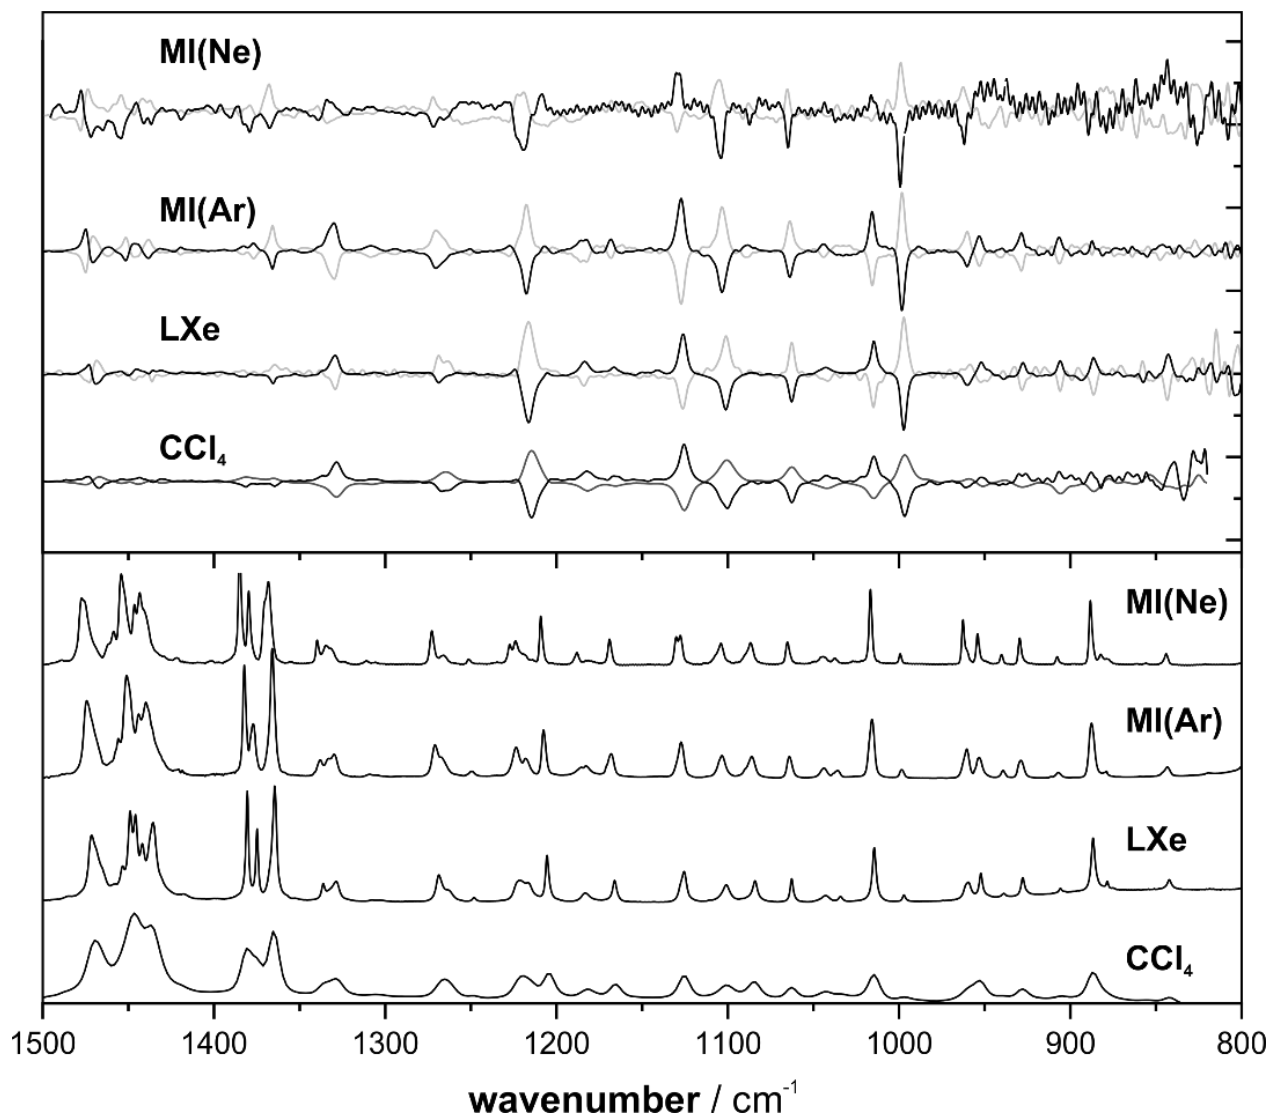

**Figure S1.** Enlarged view of the fingerprint range of the experimental spectra of  $\alpha$ -pinene.

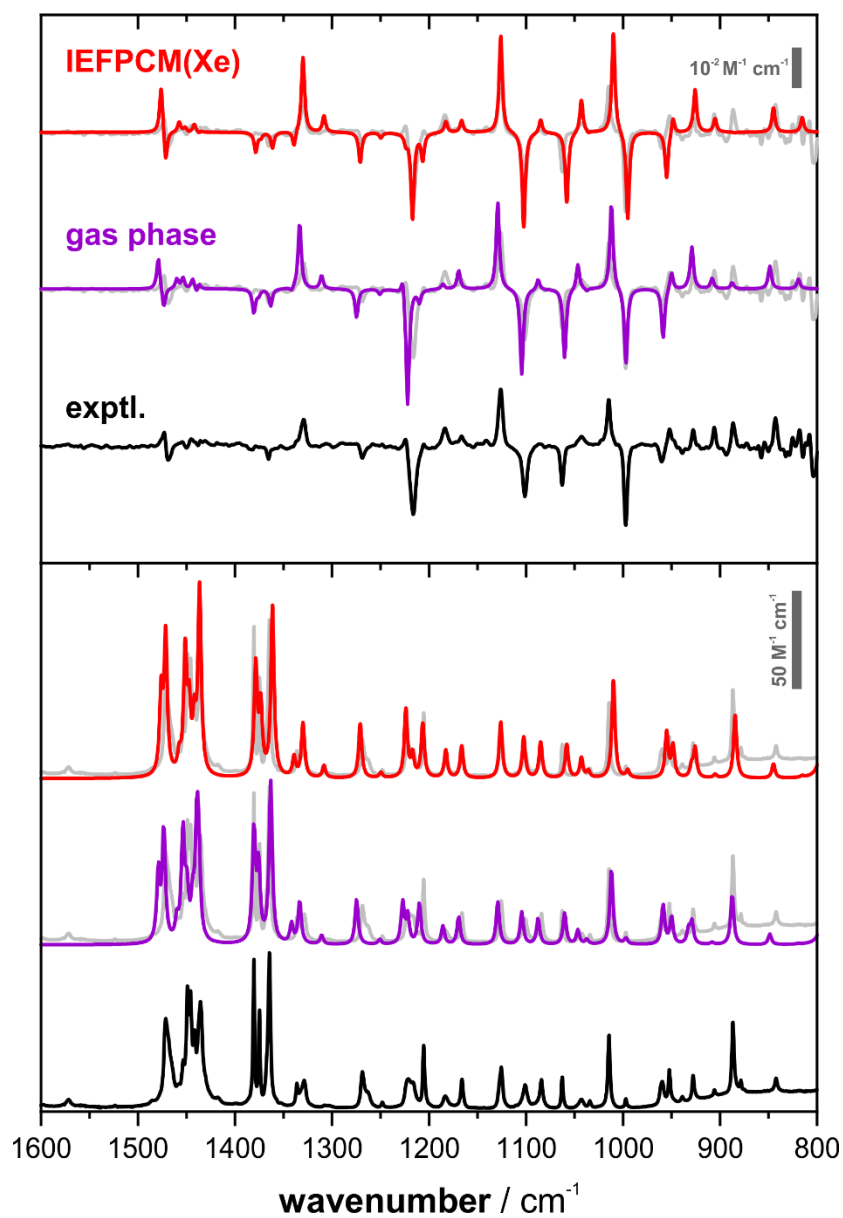

**Figure S2.** Solvent effect on the IR and VCD spectra of  $\alpha$ -pinene (B3PW91D3)

## 2. Effect of Large Amplitude Motions on Spectra of $\alpha$ -Pinene

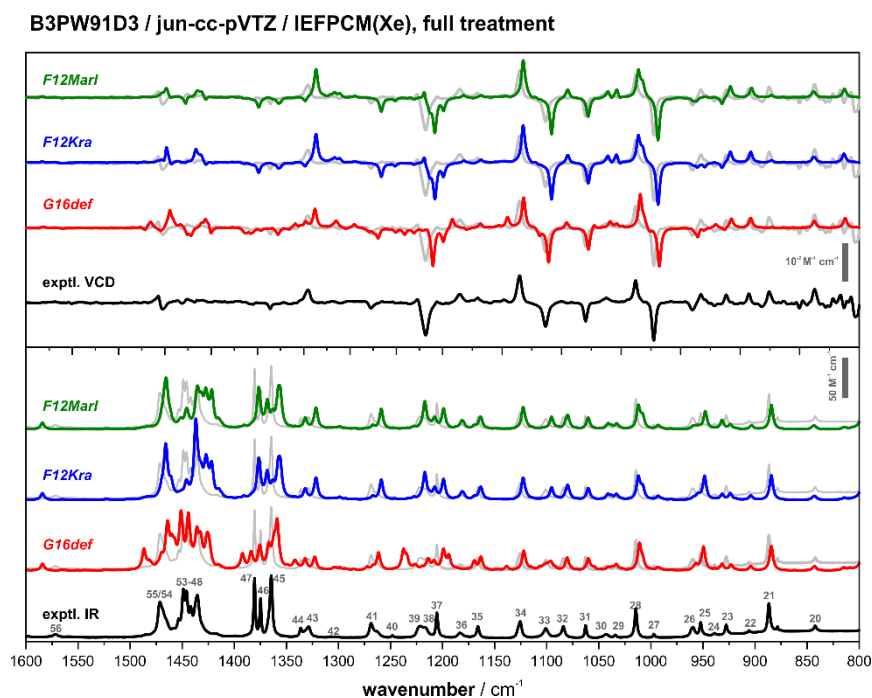

**Figure. S3.** Comparison of the experimental and calculated spectra obtained at the B3PW91D3 / jun-cc-pVTZ / IEFPCM(Xe) level of theory and considering all modes.

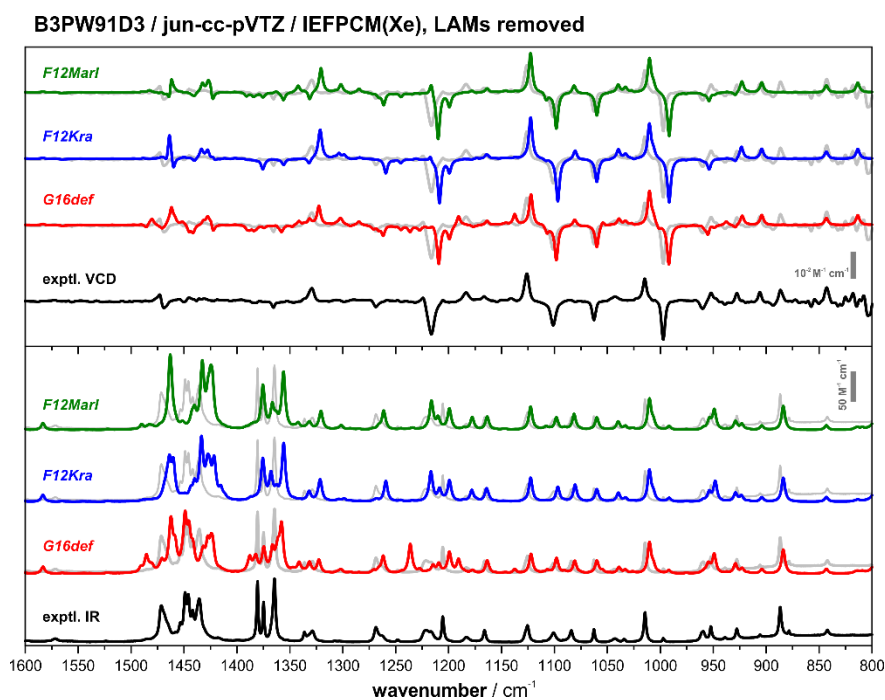

**Figure. S4.** Comparison of the experimental and calculated spectra obtained at the B3PW91D3 / jun-cc-pVTZ / IEF-PCM(Xe) level of theory after removal of contributions from large amplitude motions (modes 2, 4, 5).

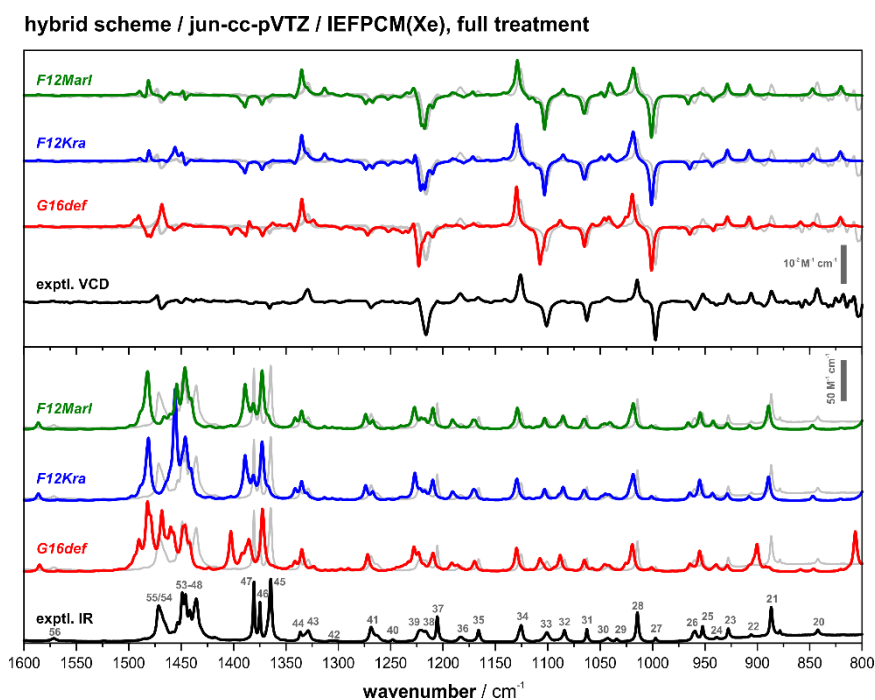

**Figure. S5.** Comparison of the experimental and calculated spectra obtained with the hybrid scheme and jun-cc-pVTZ/IEF-PCM(Xe), considering all modes.

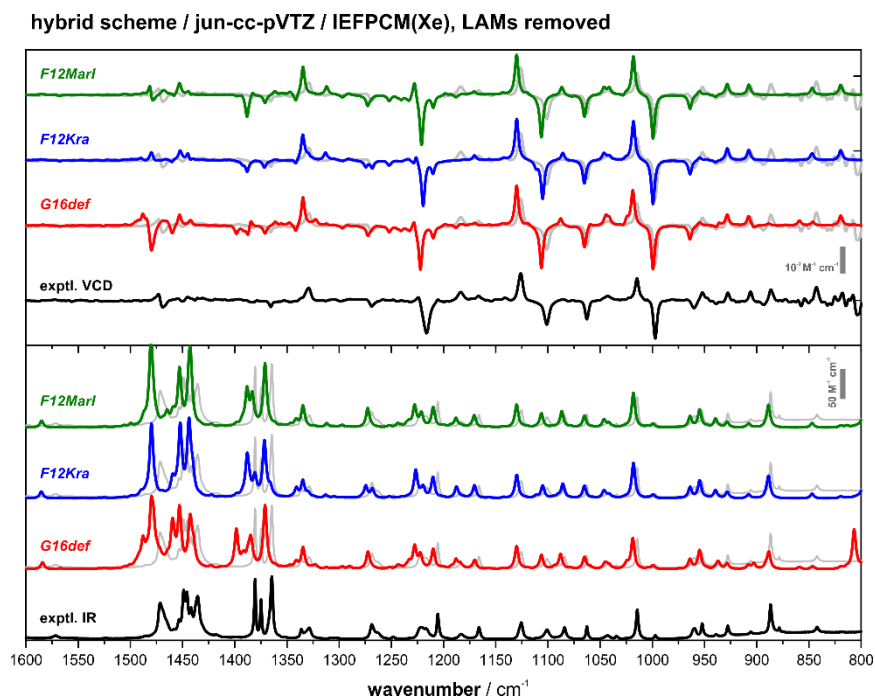

**Figure. S6.** Comparison of the experimental and calculated spectra obtained with the hybrid scheme and jun-cc-pVTZ/IEF-PCM(Xe) after removal of contributions from large amplitude motions (modes 2, 4, 5).

### 3. Additional Figures for $\beta$ -Pinene

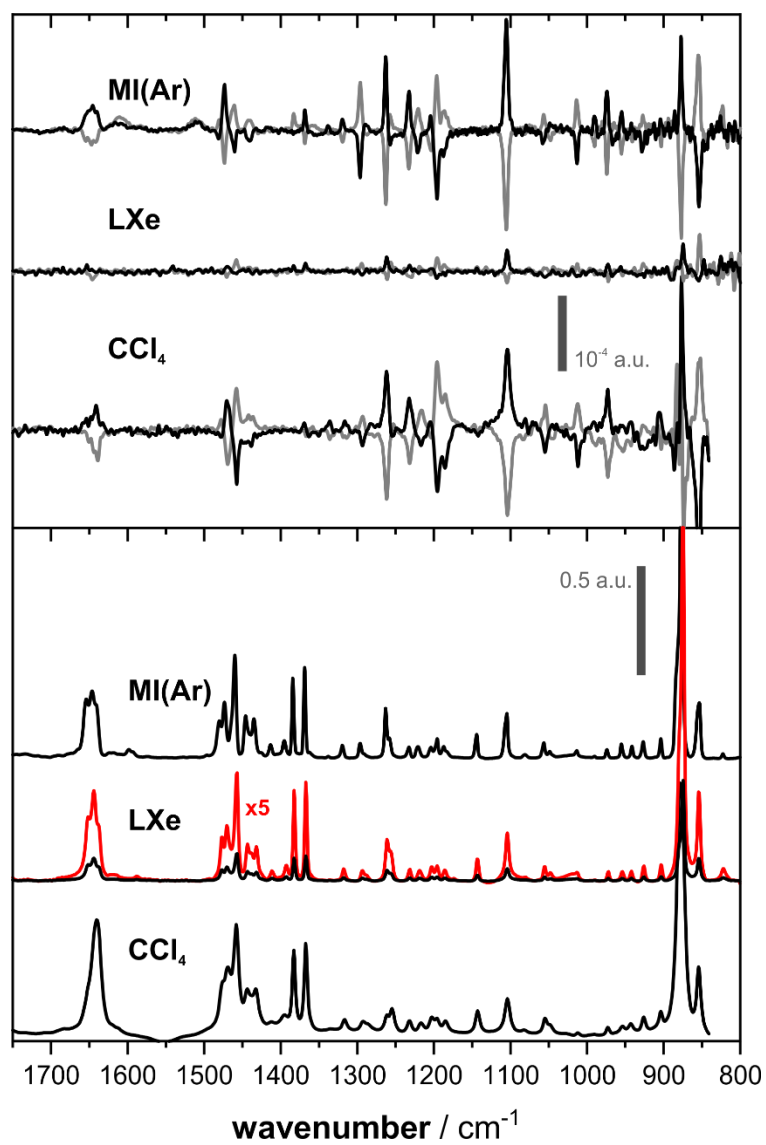

**Figure S7.** Comparison of the experimental spectra of  $\beta$ -pinene in different environments.

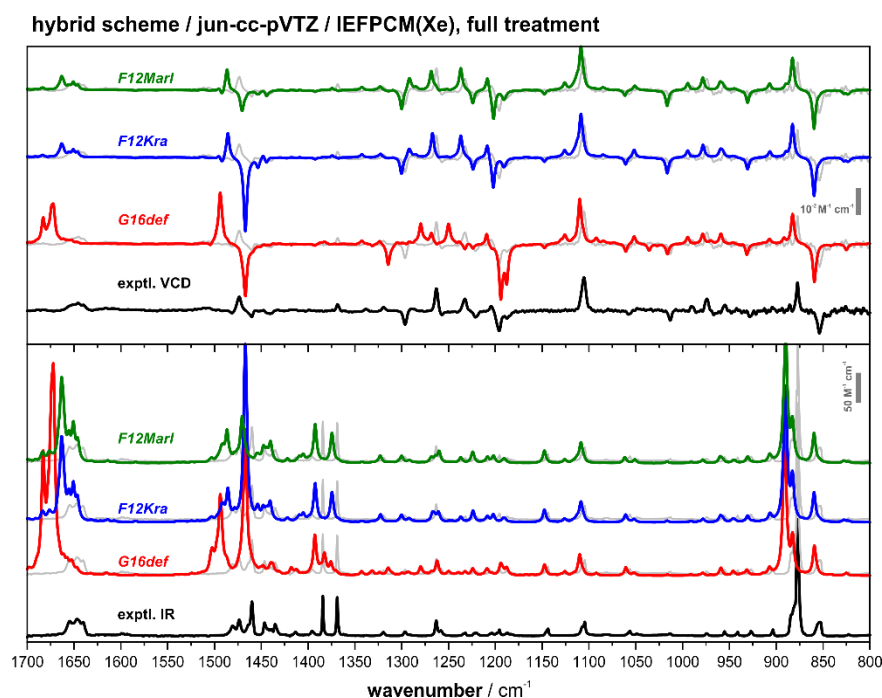

**Figure. S8.** Comparison of the experimental and calculated spectra of  $\beta$ -pinene obtained with the hybrid scheme and jun-cc-pVTZ/IEF-PCM(Xe), considering all modes.

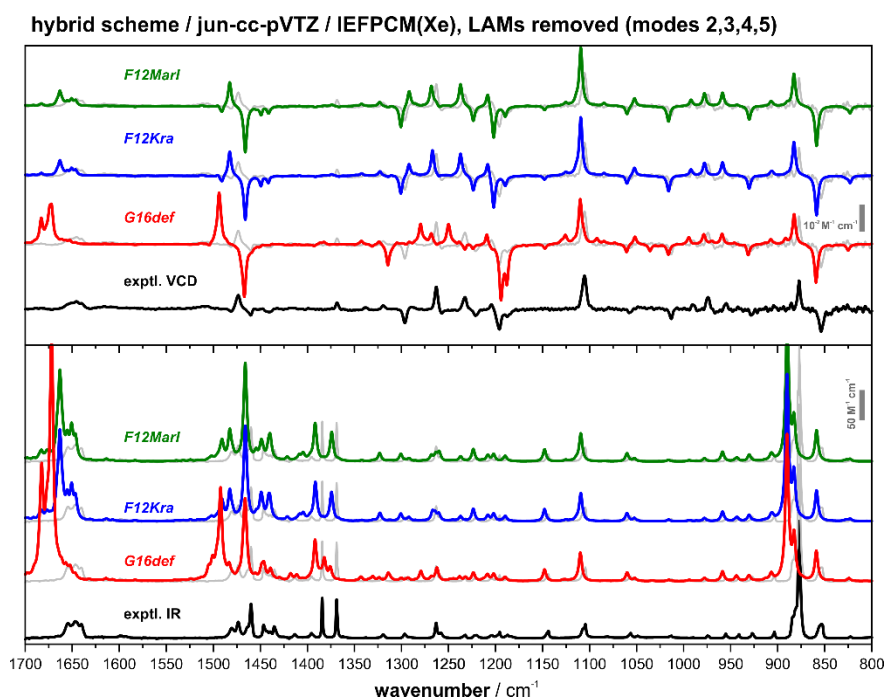

**Figure. S9.** Comparison of the experimental and calculated spectra of  $\beta$ -pinene obtained with the hybrid scheme and jun-cc-pVTZ/IEF-PCM(Xe) after removal of contributions from large amplitude motions (modes 2, 3, 4, 5).
